# Supplementary material for: N-Methyltransferase CaASHH3 Acts as a Positive Regulator of Immunity against Bacterial Pathogens in Pepper
Source: MDPI journal article supplement (doi:10.3390/ijms23126492), 2022-06-10
Supplement: s1 [file s1]

# N-methyltransferase CaASHH3 Acts as a Positive Regulator of Immunity Against Bacterial Pathogens in Pepper

Ansar Hussain<sup>1,2,†</sup>, Ali Noman<sup>3</sup>, Muhammad Furqan Ashraf<sup>4</sup>, Muhammad Ifnan Khan<sup>1,2</sup>, Zhiqin Liu<sup>1,\*</sup>, Shuilin He<sup>1,\*</sup>

<sup>1</sup>Key Laboratory of Applied Genetics of Universities in Fujian Province, Fujian Agriculture and Forestry University, Fuzhou, 350002, China

<sup>2</sup>Department of Plant Breeding and Genetics, Ghazi University, Dera Ghazi Khan, Pakistan

<sup>3</sup>Department of Botany, Government College University, Faisalabad, Pakistan

<sup>4</sup>State Key Laboratory of Subtropical Silviculture, Zhejiang A&F University, 666 Wusu Street, Lin'An, Hangzhou, 311300, China

\* Correspondence: [lzqfujian@126.com](mailto:lzqfujian@126.com) (Zhiqin Liu), [shlhe201304@aliyun.com](mailto:shlhe201304@aliyun.com) (Shuilin He);

## SUPPLEMENTARY MATERIALS

### Supplementary Figures

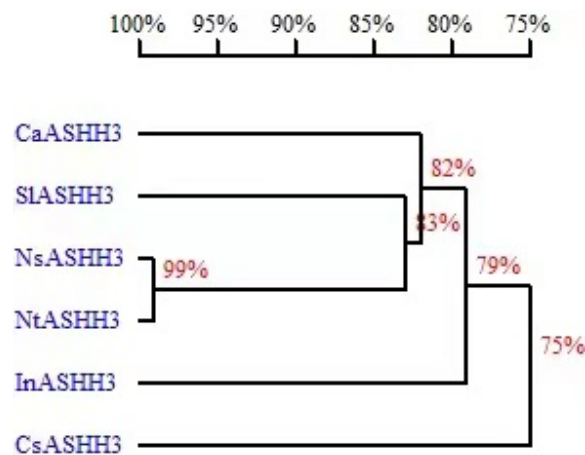

Supplementary Figure S1. Dendrogram presenting amino acid similarity of CaASHH3 and SET domains from other species

CaASHH3 shares 83% of amino acid identities with SIASHH3, NsASHH3 and NtASHH3, 82% of amino acid identities with InASHH3, and 79% with CsASHH3, respectively.

**Supplementary Table S1. Pepper primers used for vectors' construction**

| Gene                         | Forward primer (5'-3') | Reverse primer (3'-5') | Size (bP) |
|------------------------------|------------------------|------------------------|-----------|
| <i>CaASHH3</i> <sup>1</sup>  | ATGAAGCACAGTGGGGAAAA   | TCATAGCTTCTGCTTGCATT   | 924       |
| <i>Ca ASHH3</i> <sup>2</sup> | CGCCACCTCTACCAAAGAG    | ACAATGTTGTGTCAATCATCCA | 310       |
| <i>Ca ASHH3</i> <sup>3</sup> | ATGAAGCACAGTGGGGAAAA   | TAGCTTCTGCTTGCATTCCA   | 924       |

1Primers for full length cloning of CaASHH3

2Primers for construction of TRV:CaASHH3vector

3Primers for construction of 35S:CaASHH3-GFP

**Supplementary Table S2. Primers used in Real timeqRT PCR analyses**

| Gene                        | Accession number | Forward primers (5'-3')       | Reverse primers(3'-5')        | Size (bp) |
|-----------------------------|------------------|-------------------------------|-------------------------------|-----------|
| <i>CaASHH3</i> <sup>1</sup> | LOC107875209     | GACGGTGAGACAAGAATTGAC         | ATAGCTTCTGCTTGCATTCC          | 219       |
| <i>CaPR1</i>                | AF348141.1       | GCCGTGAAGATGTGGGTCAATGA       | TGAGTTACGCCAGACTACCTGAGTA     | 108       |
| <i>CaNPR1</i>               | X61679.1         | ACTTCTTCGCCGACGCCAAG          | GCCAACACATTACACAGAGCATC       | 190       |
| <i>CaABR1</i>               | CA524559         | ATGACAGGCACAACAGAAGAAAAT      | AATAAGTTATGACAGAGCCATTTT      | 148       |
| <i>CaActin</i>              | GQ339766         | AGGGATGGGTCAAAGGATGC          | GAGACAACACCGCCTGAATAGC        | 225       |
| <i>18srRNA</i>              | EF564281         | CCGGTCCGCCTATGGTGTGCACCGGTCGT | GCAGTTGTTCTGCTTTTCATAAATCCAAG | 285       |

C

AA

1 Specific primers to detect relative expression of CaWRKY30 designed according to the sequence in 3'UTR

Specific primers for marker genes

Supplementary Table S3. Primers used in ChIP experiment

| Gene       | GenBank<br>Accession # | F_primer                | R_primer                 |
|------------|------------------------|-------------------------|--------------------------|
| PNPR1-Tss  | X61679.1               | CAAAAAAATGGCAAACCTCTC   | AGGGAAAAGAAGAGG<br>AGATA |
| PHSP24-Tss | HM132040               | TGAGTTTCTCGAATCCTTTTCCC | TTCGCCGACTTAGCTTC<br>ACG |
| PPR1-Tss   | XM_016683907.<br>1     | AGTAGTGGCGGCTGTTATCG    | AGCAGACTCTACAGGA<br>TTAT |
| PNPR1-CK   | X61679.1               | GAGCTAATAAATGAGCAGGT    | CAATTATCCAGGAAA<br>ATGCT |
| PHSP24-CK  | HM132040               | TTTGACTCAATTTACTAGCG    | CGTAAACTATTGATA<br>TTTTA |
| PPR1-CK    | XM_01668390<br>7.1     | ATATAAATCCTTATTATAAG    | ACCAAGTGGTCCATA<br>ACGAT |
